# Supplementary material for: Anti-PLA2R1 Antibodies Containing Sera Induce In Vitro Cytotoxicity Mediated by Complement Activation
Source: Hindawi journal article supplement (doi:10.1155/2019/1324804), 2019-12-30
Supplement: f1 [file 1324804.f1.pdf]

## **Supplementary materials**

### **Figure Sup 1A**

Serum dilutions were associated to decrease (dilution 1:3) or negative (dilution 1:10) cytotoxicity. (Figure Sup 1A). Standard rabbit complement (5  $\mu$ l/well, Cedarlane©, Ontario, Canada) or OptiMEM were added and incubated for 1 hour at room temperature. Dead cells were revealed after adding 2.5  $\mu$ l/well of Fluoroquench AO/EB staining/quench (Ingen©Chilly-Mazarin, France) for 10 minutes in the dark. The percentage of dead cells was estimated using a fluorescent microscope (Videomicroscope Zeiss LSM780).

### **Figure sup 1B and 1C**

Two investigators read plates blindly with a good correlation ( $r_s=0.81$   $p<0.0001$ ) (Figure 1B) and an excellent concordance (ICC=0.89 [0.85; 0.92] (Figure 1C).

### **Figure Sup 2**

Various versions of gelatin veronal buffer (GVB) were used to determine the complement pathway involved in anti-PLA2R1 cytotoxicity. GVB supplemented with EDTA (GVB-EDTA) (ComplementTech©) was used to inhibit all complement activation pathways, whereas GVB supplemented with magnesium and EGTA (Mg-EGTA) (ComplementTech©) was used to inhibit the classical and lectin pathways, but not the alternative one. Three microliters of three PLA2R1-positive sera were diluted in 5  $\mu$ l of GVB supplemented with GVB-EDTA or Mg-EGTA and 5  $\mu$ l of standard rabbit complement. Cytotoxicity was assessed as described above. We confirmed in these conditions the inhibition of the classical pathway activity by measuring CH50 (Total Haemolytic Complement Kits Binding Site©) (Figure Sup 2).

All cytotoxicity assays were performed using the same batch of HEK293 T-Rex cells. A minimal of 50 cells per well was necessary for reading.

**Figure Sup 3. ROC Curve of cell cytotoxicity between MN patients and healthy donors**

Using ROC curve analysis, we identified a threshold >10% of cytotoxicity associated with a positive test with a sensitivity at 87.5% and specificity at 84.6% (AUC=0.90 [0.83 to 0.98] p<0.0001)

**Figure sup 4. Correlation between anti-PLA2R1 IgG1, 2, 3 and 4 titer and complement-mediated cytotoxicity.**

OD: Optic Density

**Figure sup 5. Correlation between anti-PLA2R1 titer and epitope spreading**

**A**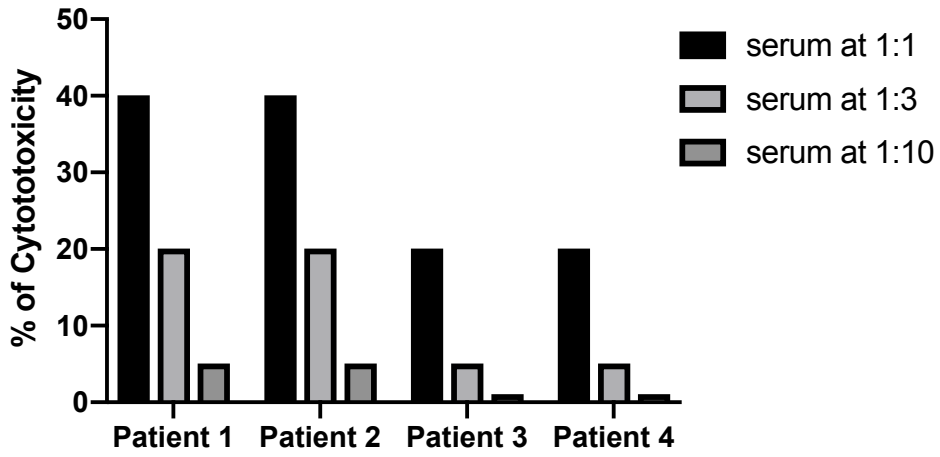**B**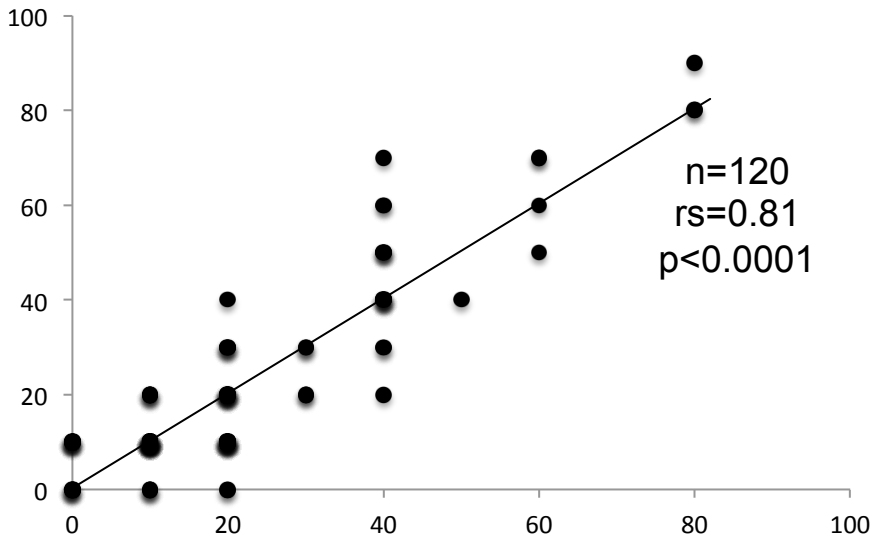**C**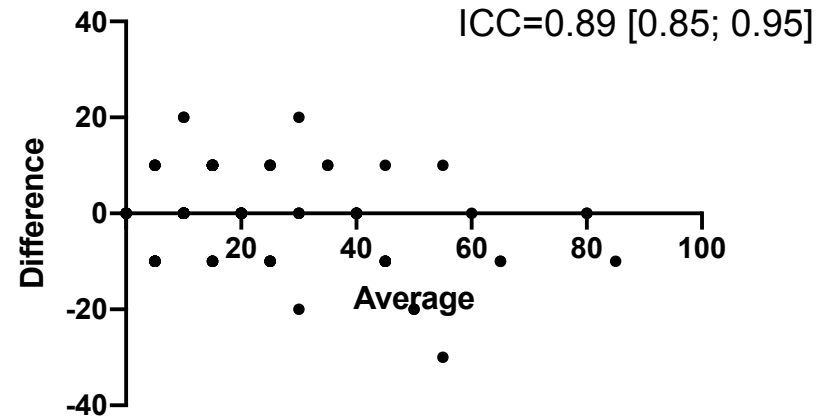

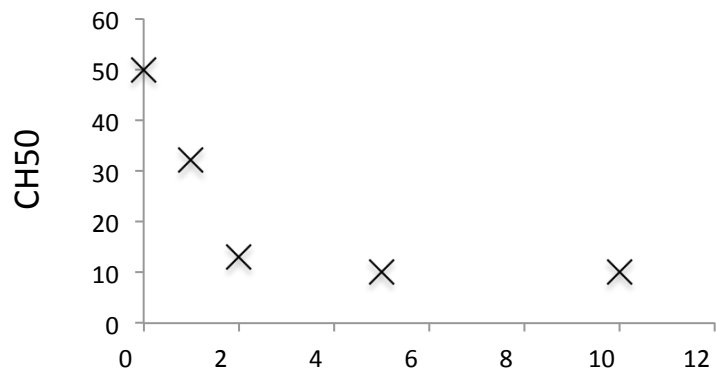

Volume (μl) of GVBE added in 3 μl of serum and 5 μl of complement

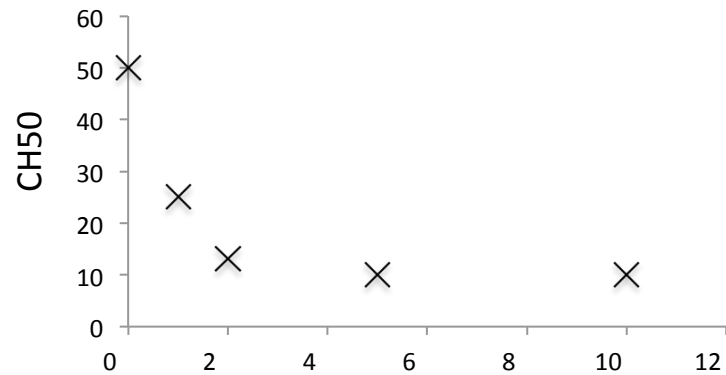

Volume (μl) of Mg-EGTA added in 3 μl of serum and 5 μl of complement

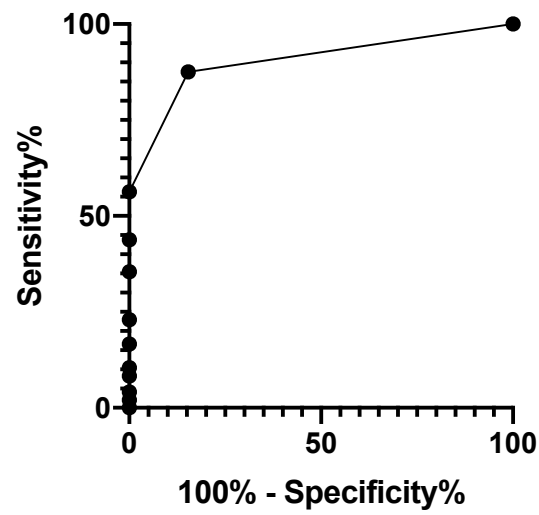

AUC=0.90  
p<0.0001  
Threshold<10% Se=87.50 Spe=84.62

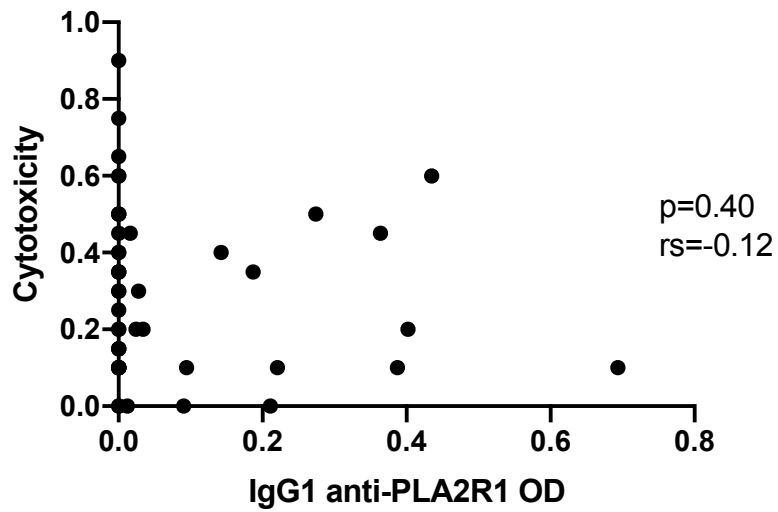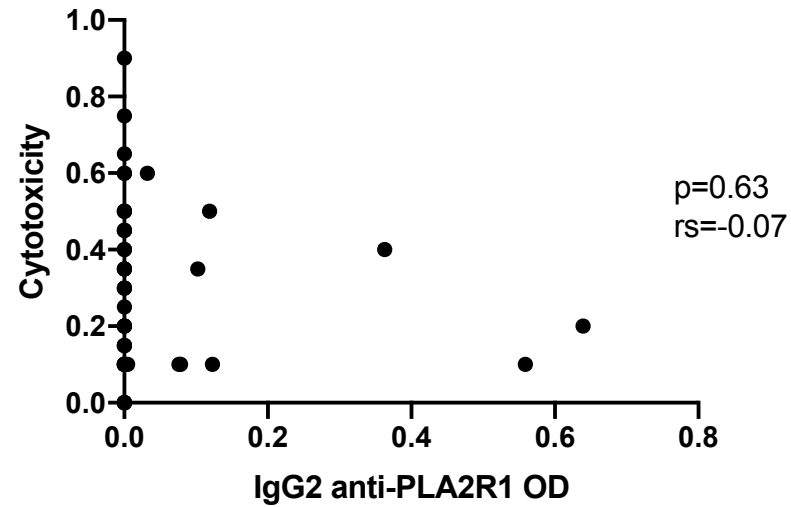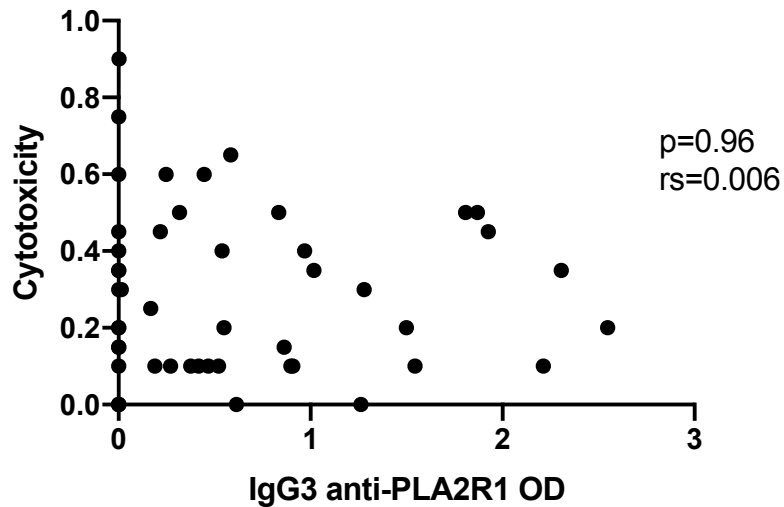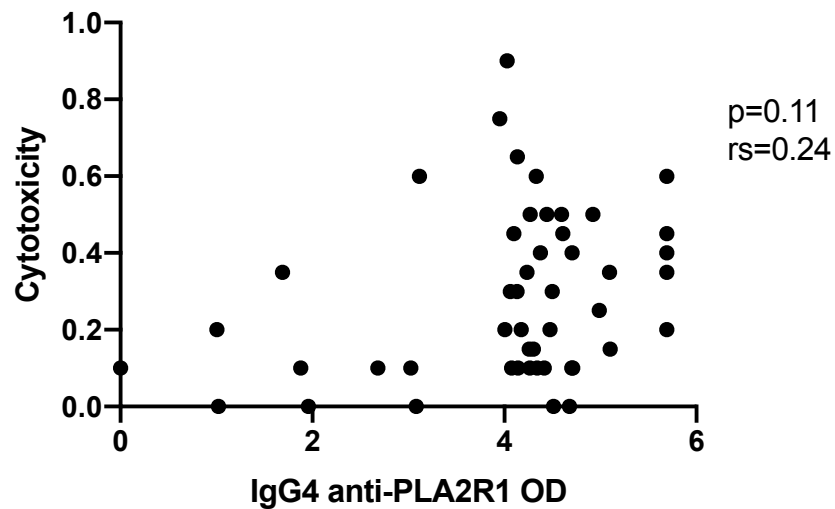

Figure sup 4

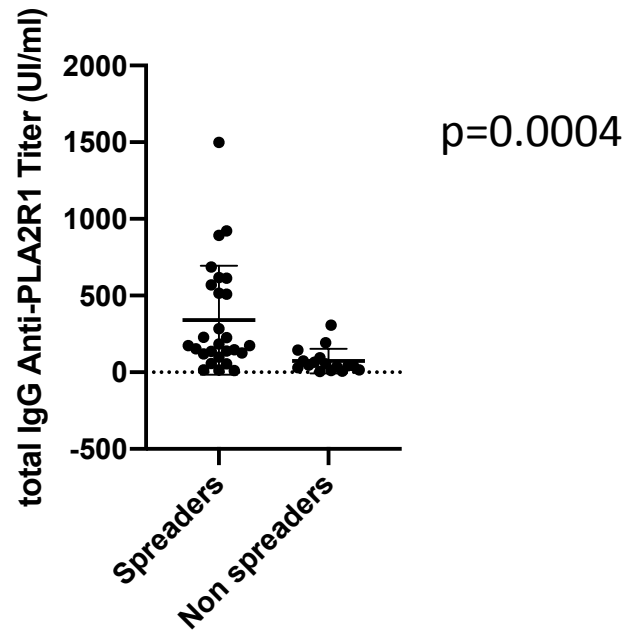

Figure sup 5
